# Supplementary material for: Transcriptomic and Metabolomic Profiling Reveals the Effect of LED Light Quality on Fruit Ripening and Anthocyanin Accumulation in Cabernet Sauvignon Grape
Source: Front Nutr. 2021 Dec 14;8:790697. doi: 10.3389/fnut.2021.790697 (PMC8713590; doi:10.3389/fnut.2021.790697)
Supplement: Supplementary file 3 [file Data_Sheet_3.xlsx]

## Sheet: R
Table S1 Aroma substance content after different light quality treatments
Component Name	Retention Time	Reference m/z	BP Area	BP Height	TIC	Formula (mol ion)	CAS No.	SI	RSI	Content(mg/g)
Acetaldehyde	1.372	44.036	26048575	10198894	18335585	C2H4O	75-07-0	952	952	0.0106588
1-Propanol	1.641	42.061	1285958	458163	684498	C3H8O	71-23-8	830	830	0.0005262
Methacrolein	1.698	39.021	718601	295926	559655	C4H6O	78-85-3	843	843	0.000294043
Acetic acid	1.714	45	15240167	3387746	5282526	C2H4O2	64-19-7	825	825	0.00623611
Ethyl Acetate	1.869	43.033	32039869	9892651	17412710	C4H8O2	141-78-6	883	883	0.0131104
Trichloromethane	1.899	83.051	3057477	1335766	2564116	CHCl3	67-66-3	951	951	0.00125109
Cyclopropane	1.929	42.061	914570	353024	627882	C3H6	75-19-4	856	966	0.000374232
2(3H)-Furanone, dihydro-3-methyl-	2.174	41.048	2546559	890085	2480460	C5H8O2	1679-47-6	820	836	0.00104202
3-Buten-2-one, 3-methyl-	2.274	41.048	1864447	696395	2404302	C5H8O	814-78-8	886	886	0.000762911
Pentanal	2.465	44.036	30600833	10350258	30816709	C5H10O	110-62-3	842	866	0.0125215
1,3-Dioxolane, 2,4,5-trimethyl-	2.838	43.033	4369570	1112628	4560213	C6H12O2	3299-32-9	893	893	0.00178798
Pentane, 1-chloro-	3.237	41.048	3976101	1413189	6846310	C5H11Cl	543-59-9	840	851	0.00162698
sec-Butyl acetate	3.317	43.033	8570437	2850868	3879219	C6H12O2	105-46-4	867	870	0.00350693
Cyclobutanone, 2,2,3-trimethyl-	3.458	42.061	4831472	1084583	3166178	C7H12O	1449-49-6	832	844	0.00197698
Toluene	3.492	91.07	4433098	798774	1254297	C7H8	108-88-3	910	910	0.00181397
2,3-Butanediol, [S-(R*,R*)]-	3.911	45	34807042			C4H10O2	19132-06-0	922	934	0.0142427
Chlorine dioxide	4.115	69.052	27649799	6800773	6800773	ClO2	10049-04-4	990	999	0.011314
2-Hexenal	5.524	41.048	29940465	5864863	36142670	C6H10O	505-57-7	844	848	0.0122513
2-Pentyn-4-one	5.943	67.029	34608852	4244134	5415881	C5H6O	7299-55-0	840	874	0.0141616
N-(Benzyloxy)-2,2,2-trifluoroacetamide	6.134	91.07	1778427	373071	373071	C9H8F3NO2	174075-91-3	828	936	0.000727712
Heptane, 2,3-dimethyl-	6.225	84.098	2732007	430672	732597	C9H20	3074-71-3	891	891	0.00111791
7-Oxabicyclo[4.1.0]heptane	6.336	83.051	26481735	6091274	9585040	C6H10O	286-20-4	912	912	0.010836
trans-2-Hexenol	6.356	57.062	211659481	34653050	114406421	C6H12O		828	836	0.0866087
2,2-Dimethylvaleric acid	7.942	85.106	1760464	261743	499132	C7H14O2	1185-39-3	835	860	0.000720362
Oxime-, methoxy-phenyl-_	8.157	133.001	4920524	658061	1056525	C8H9NO2		839	846	0.00201342
2-Heptenal, (Z)-	10.558	41.048	24657316	4028959	26431316	C7H12O	57266-86-1	936	942	0.0100895
1-Octen-3-one	11.765	55.039	6923303	2419188	6085432	C8H14O	4312-99-6	809	816	0.00283294
Oxetane, 3-(1-methylethyl)-	11.819	55.039	10503941	2237409	4354751	C6H12O	10317-17-6	804	810	0.0042981
1-Octen-3-ol	11.845	57.062	16655284	2886123	3299795	C8H16O	3391-86-4	843	843	0.00681516
3,6-Dimethyl-4-octanone	12.191	57.062	7962264	2072151	6891694	C10H20O	34645-03-9	809	872	0.00325807
5-Hepten-2-one, 6-methyl-	12.204	43.033	50048755	8377613	28278030	C8H14O	110-93-0	869	877	0.0204794
Octanal	13.033	43.033	14599949	2299118	11996746	C8H16O	124-13-0	800	800	0.00597414
1-Hexanol, 2-ethyl-	14.478	57.062	4441502	872562	1723638	C8H18O	104-76-7	822	834	0.00181741
3-Ethyl-3-methylheptane	15.954	57.062	3953337	671304	1702687	C10H22	17302-01-1	811	812	0.00161766
Nonanal	18.382	57.062	12632850	2698940	21854050	C9H18O	124-19-6	922	923	0.00516922
3-Cyclohexene-1-methanol, .alpha.,.alpha.,4-trimethyl-, (R)-	22.714	59.04	4742444	674803	2033626	C10H18O	7785-53-7	877	877	0.00194056
Decanal	23.536	41.048	5237954	1058030	8482872	C10H20O	112-31-2	927	927	0.00214331
Benzaldehyde, 2,4-dimethyl-	23.865	133.001	2977706	325539	325539	C9H10O	15764-16-6	847	853	0.00121844
Benzene, 1,3-bis(1,1-dimethylethyl)-	25.857	175.148	3111513	670599	1048988	C14H22	1014-60-4	871	871	0.0012732
2-Decenal, (E)-	26.229	41.048	989346	298027	1063547	C10H18O	3913-81-3	857	859	0.000404829
Benzene, 1,3,5-trichloro-2-methoxy-	29.214	194.909	1008024	181065	181065	C7H5Cl3O	87-40-1	874	874	0.000412472
2-Buten-1-one, 1-(2,6,6-trimethyl-1,3-cyclohexadien-1-yl)-, (E)-	32.111	69.052	10891684	2656975	7618602	C13H18O	23726-93-4	909	934	0.00445676
Undecane, 4,7-dimethyl-	32.812	57.062	2841072	744781	2394779	C13H28	17301-32-5	869	883	0.00116253
5,9-Undecadien-2-one, 6,10-dimethyl-, (E)-	34.479	43.033	12735538	4117377	11720788	C13H22O	3796-70-1	892	892	0.00521124
Diisopropyl adipate	34.556	129.111	694871	212953	212953	C12H22O4	6938-94-9	870	873	0.000284333
1-Undecanol	35.042	41.048	389437	155388	155388	C11H24O	112-42-5	843	853	0.000159353
Glutarimide	35.19	112.812	1090810	262906	788718	C5H7NO2	1121-89-7	910	974	0.000446347
trans-.beta.-Ionone	35.347	177.126	1379935	480727	817396	C13H20O	79-77-6	880	880	0.000564654
Dodecane, 2,7,10-trimethyl-	35.663	57.062	1665465	616672	2015372	C15H32	74645-98-0	838	850	0.00068149
2,4-Di-tert-butylphenol	35.951	191.134	19638418	7978051	22993256	C14H22O	96-76-4	919	919	0.00803582
Benzamide, N,N-diethyl-4-methyl-	37.289	119.043	4727647	1588763	3193960	C12H17NO	5/4/2728	882	891	0.0019345
Diethyl Phthalate	37.561	149.021	1222754	426778	426778	C12H14O4	84-66-2	912	914	0.000500337
Pentanoic acid, 2,2,4-trimethyl-3-carboxyisopropyl, isobutyl ester	37.604	71.067	16046781	6529277	14548590	C16H30O4		831	831	0.00656616
Cyclopentaneacetic acid, 3-oxo-2-pentyl-, methyl ester	38.533	83.051	9728871	4034391	14750932	C13H22O3	24851-98-7	818	829	0.00398095
Methanone, (1-hydroxycyclohexyl)phenyl-	39.107	99.082	2248385	783245	1674748	C13H16O2	947-19-3	889	891	0.000920014
Tridecane, 2-methyl-	39.328	71.067	5733631	2060372	11292472	C14H30	1560-96-9	839	848	0.00234614
1,2-Benzenedicarboxylic acid, bis(2-methylpropyl) ester	41.38	149.021	11336216	4485882	7791031	C16H22O4	84-69-5	889	889	0.00463865
Eicosane, 2-methyl-	41.981	57.062	3917140	1252284	6739017	C21H44	1560-84-5	824	826	0.00160285
7,9-Di-tert-butyl-1-oxaspiro(4,5)deca-6,9-diene-2,8-dione	42.014	205.098	400496	179998	179998	C17H24O3	82304-66-3	815	827	0.000163878
Dibutyl phthalate	42.444	149.021	7052059	2597229	3697441	C16H22O4	84-74-2	920	938	0.00288562
3-Octanol	12.75		3.02428e+09	5.22251e+08						1.2375

## Sheet: W
Table S1 Aroma substance content after different light quality treatments
Component Name	Retention Time	Reference m/z	BP Area	BP Height	TIC	Formula (mol ion)	CAS No.	SI	RSI	Content(mg/g)
Carbamic acid, monoammonium salt	1.322	44.029	24005581	12441677	12750755	CH6N2O2	1111-78-0	961	972	0.010141
Acetaldehyde	1.386	44.038	13611733	5528362	9443056	C2H4O	75-07-0	913	913	0.00575016
Trimethylene oxide	1.506	58.075	935558	382741	382741	C3H6O	503-30-0	802	802	0.000395219
Methacrolein	1.708	39.029	743074	343924	852616	C4H6O	78-85-3	852	852	0.000313905
Hydrazine, ethyl-	1.728	44.997	20801221	3470538	6339186	C2H8N2	624-80-6	818	818	0.0087873
Ethyl Acetate	1.882	43.063	24379026	7969505	13771830	C4H8O2	141-78-6	897	897	0.0102987
Trichloromethane	1.909	83.06	6496610	2913973	6750614	CHCl3	67-66-3	955	955	0.00274444
3-Buten-2-one, 3-methyl-	2.284	41.051	1804078	673390	2245697	C5H8O	814-78-8	878	878	0.000762117
1H-Imidazole, 4,5-dihydro-2-methyl-	2.392	55.04	8377939	2696470	3265127	C4H8N2	534-26-9	902	904	0.00353919
Carbonic acid, hexyl methyl ester	2.465	77.014	1181032	252164	252164	C8H16O3		810	815	0.000498917
Pentanal	2.479	44.038	32736136	11595968	37317467	C5H10O	110-62-3	848	873	0.0138291
Pentane, 1-chloro-	3.247	55.04	7301215	2230323	9452890	C5H11Cl	543-59-9	877	878	0.00308434
sec-Butyl acetate	3.331	43.063	7012587	2399421	3041266	C6H12O2	105-46-4	827	831	0.00296241
1-Pentene	3.472	42.057	4520670	1039164	3104672	C5H10	109-67-1	885	885	0.00190972
Toluene	3.495	91.05	12504312	2501614	4524316	C7H8	108-88-3	927	927	0.00528234
5-Hexen-3-one	3.555	41.051	2467242	545318	1120244	C6H10O	24253-30-3	803	846	0.00104227
2,3-Butanediol, [S-(R*,R*)]-	3.924	44.997	33330979			C4H10O2	19132-06-0			0.0140804
Heptane, 2,4-dimethyl-	4.749	43.063	8298139	1887317	5429633	C9H20	2213-23-2	862	874	0.00350548
2-Hexenal	5.531	41.051	41275420	7999861	53108471	C6H10O	505-57-7	857	858	0.0174365
2-Pentyn-4-one	5.977	67.033	30162064	3674160	4441628	C5H6O	7299-55-0	916	953	0.0127417
Ethylbenzene	6.151	91.05	3640460	856689	1461091	C8H10	100-41-4	825	827	0.00153788
2-Ethyl-3-vinyloxirane	6.352	69.056	52094412	10511324	21221504	C6H10O	34485-78-4	825	827	0.0220068
trans-2-Hexenol	6.369	57.051	216648841	42221904	152583207	C6H12O		883	891	0.0915215
Cyclopropane, propyl-	6.473	56.071	86502384	20109406	92504359	C6H12	2415-72-7	827	834	0.0365422
o-Xylene	7.489	91.05	4148561	500155	718126	C8H10	95-47-6	809	821	0.00175252
2,2'-Bipyrrolidine	7.918	70.065	3553413	636763	1121590	C8H16N2		961	999	0.00150111
Pentanoic acid, ethyl ester	7.952	85.107	1817587	279312	549115	C7H14O2	539-82-2	833	833	0.000767824
Oxime-, methoxy-phenyl-_	8.177	133.013	3099047	525673	813664	C8H9NO2		851	858	0.00130917
2-Heptenal, (Z)-	10.558	41.051	28961107	5078155	33913123	C7H12O	57266-86-1	936	948	0.0122344
Benzaldehyde	10.739	77.014	1456889	171734	171734	C7H6O	100-52-7	843	848	0.00061545
Methyl vinyl ketone	11.815	55.04	12357036	2806448	4925355	C4H6O	78-94-4	895	911	0.00522013
N,N'-Bis(2-methyl-2-nitrosopentan-4-one)	12.134	43.063	3380552	1428814	1758207	C12H22N2O4	94514-30-4	821	841	0.00142809
Succinimide	12.191	99.095	5855345	1448019	1968489	C4H5NO2	123-56-8	841	895	0.00247354
5-Hepten-2-one, 6-methyl-	12.204	43.063	61133210	10353649	36560770	C8H14O	110-93-0	868	879	0.0258252
Propanedioic acid, propyl-	12.462	60.065	8782650	1254634	2475546	C6H10O4	616-62-6	907	910	0.00371016
Propargyl alcohol	13.016	55.04	38780979	4942081	4942081	C3H4O	107-19-7	943	966	0.0163827
3-Ethyl-3-methylheptane	15.957	57.051	5917294	1033516	3192054	C10H22	17302-01-1	827	834	0.00249971
Nitrogen trifluoride	18.375	71.06	3746919	556088	556088	F3N	7783-54-2	851	999	0.00158285
Nonanal	18.382	57.051	11564968	2421844	18616747	C9H18O	124-19-6	915	915	0.00488552
Hydrazine, 1,1-diethyl-	19.351	72.939	1399408	249072	498144	C4H12N2	616-40-0	863	881	0.000591168
2-Thiazolone	20.571	101.086	1698084	316389	316389	C3H3NOS		904	942	0.000717341
Cyclohexanol, 5-methyl-2-(1-methylethyl)-, (1.alpha.,2.beta.,5.alpha.)-(卤)-	21.799	71.06	4615616	881499	4729133	C10H20O	15356-70-4	847	860	0.00194983
Decanal	23.536	41.051	5187524	1051311	8356947	C10H20O	112-31-2	917	918	0.00219143
Benzaldehyde, 2,5-dimethyl-	23.865	134.054	2368947	261984	504207	C9H10O	5779-94-2	882	886	0.00100074
Benzene, 1,3-bis(1,1-dimethylethyl)-	25.85	175.13	4622160	1018886	1563036	C14H22	1014-60-4	913	913	0.00195259
Benzene, 1,3,5-trichloro-2-methoxy-	29.207	196.926	427782	149426	149426	C7H5Cl3O	87-40-1	870	870	0.000180713
2-Buten-1-one, 1-(2,6,6-trimethyl-1,3-cyclohexadien-1-yl)-, (E)-	32.108	69.056	16365783	3952181	12506114	C13H18O	23726-93-4	906	927	0.00691359
Decane, 2,3,5-trimethyl-	32.809	57.051	3180975	854694	2765784	C13H28	62238-11-3	857	874	0.00134378
5,9-Undecadien-2-one, 6,10-dimethyl-, (E)-	34.475	43.063	14658933	4548995	13236293	C13H22O	3796-70-1	890	890	0.00619254
Diisopropyl adipate	34.549	129.116	1409694	432360	432360	C12H22O4	6938-94-9	858	858	0.000595513
Cyclopropane, nonyl-	35.042	55.04	759209	254779	915286	C12H24	74663-85-7	859	859	0.000320721
5-Ethyl-1,2,4-oxadiazol-3-amine	35.193	112.683	830315	191481	191481	C4H7N3O	171006-96-5	868	952	0.00035076
3-Buten-2-one, 4-(2,6,6-trimethyl-1-cyclohexen-1-yl)-	35.347	177.128	1987381	689598	1178213	C13H20O	14901-07-6	883	885	0.000839552
Pentadecane	35.663	57.051	1468218	564757	1864227	C15H32	629-62-9	833	833	0.000620236
2,4-Di-tert-butylphenol	35.951	191.144	16175319	6486930	16839125	C14H22O	96-76-4	903	903	0.00683313
Benzamide, N,N-diethyl-4-methyl-	37.286	119.047	5205854	1815868	3812086	C12H17NO	5/4/2728	886	895	0.00219917
Diethyl Phthalate	37.561	149.016	1442900	513709	513709	C12H14O4	84-66-2	908	913	0.000609541
Pentanoic acid, 2,2,4-trimethyl-3-carboxyisopropyl, isobutyl ester	37.604	71.06	19291229	7949170	17695292	C16H30O4		829	829	0.00814942
Cyclopentaneacetic acid, 3-oxo-2-pentyl-, methyl ester	38.533	83.06	13003172	5510278	20356659	C13H22O3	24851-98-7	806	820	0.00549308
Phenol, 2,4-di-t-butyl-6-nitro-	39.053	236.143	1704973	747465	747465	C14H21NO3	20039-94-5	809	843	0.000720251
Methanone, (1-hydroxycyclohexyl)phenyl-	39.107	99.095	2289091	762118	1587445	C13H16O2	947-19-3	892	892	0.000967007
Heptadecane, 2,6,10,15-tetramethyl-	39.328	71.06	16164346	5712842	34693109	C21H44	54833-48-6	844	844	0.00682849
3-Ethyl-3-methylheptane	39.848	71.06	779730	334964	1112956	C10H22	17302-01-1	800	836	0.00032939
Hexadecane, 2,6,11,15-tetramethyl-	39.915	71.06	8884306	2796409	15737394	C20H42	504-44-9	832	854	0.0037531
Isopropyl myristate	40.8	43.063	1239676	433740	916398	C17H34O2	110-27-0	839	843	0.000523691
Phthalic acid, butyl isohexyl ester	41.38	149.016	17952130	7173764	13846565	C18H26O4		891	898	0.00758373
Homosalate	41.686	137.975	240045	97179	97179	C16H22O3	118-56-9	818	835	0.000101405
Tridecane, 2-methyl-	41.981	57.051	4705205	1486811	8106304	C14H30	1560-96-9	823	839	0.00198767
7,9-Di-tert-butyl-1-oxaspiro(4,5)deca-6,9-diene-2,8-dione	42.014	205.105	480770	218509	218509	C17H24O3	82304-66-3	826	839	0.000203097
Dibutyl phthalate	42.447	149.016	10619269	3925506	6195682	C16H22O4	84-74-2	944	954	0.00448602
3-Octanol	12.75		2.9294e+09	5.07061e+08						1.2375

## Sheet: G
Table S1 Aroma substance content after different light quality treatments
Component Name	Retention Time	Reference m/z	BP Area	BP Height	TIC	Formula (mol ion)	CAS No.	SI	RSI	Content(mg/g)
Carbamic acid, monoammonium salt	1.308	44.044	20186799	10478566	10789586	CH6N2O2	1111-78-0	968	981	0.0054051
Acetaldehyde	1.386	44.029	10215264	3858623	6394336	C2H4O	75-07-0	920	920	0.00273518
Methacrolein	1.711	41.049	2137540	420295	990147	C4H6O	78-85-3	850	850	0.000572335
Acetic acid	1.731	45.001	23236827	4057650	7706288	C2H4O2	64-19-7	899	899	0.00622175
Ethyl Acetate	1.882	43.019	30349644	9555506	16500044	C4H8O2	141-78-6	881	881	0.00812624
Trichloromethane	1.909	83.053	4662178	2058877	4415946	CHCl3	67-66-3	956	956	0.00124832
Borane carbonyl	1.942	40.072	1276449	591335	1159637	CH3BO	13205-44-2	824	865	0.000341774
3-Buten-2-one, 3-methyl-	2.284	43.019	2412810	854905	2901760	C5H8O	814-78-8	907	907	0.000646039
1-[(1-Oxo-2-propenyl)oxy]-2,5-pyrrolidinedione	2.395	55.027	5562293	1771534	2000708	C7H7NO4	38862-24-7	804	843	0.00148933
Pentanal	2.476	44.029	33421945	11863498	38462693	C5H10O	110-62-3	862	887	0.00894886
Pentane, 1-chloro-	3.247	42.059	7398012	2162108	9873655	C5H11Cl	543-59-9	904	904	0.00198085
sec-Butyl acetate	3.327	43.019	9501912	3240175	4477588	C6H12O2	105-46-4	885	885	0.00254417
1-Pentanol	3.468	42.059	5555792	1209837	3523918	C5H12O	71-41-0	852	852	0.00148759
Spiro[2,4]hepta-4,6-diene	3.495	91.052	9087183	1708608	2917706	C7H8	765-46-8	887	887	0.00243313
Propanoic acid, 2-hydroxy-, propyl ester	3.716	45.001	10089133	2153079	2509004	C6H12O3	616-09-1	916	950	0.00270141
L-Lactic acid	3.938	45.001	6888838	1532916	1791773	C3H6O3	79-33-4	894	894	0.00184451
2-Hexenal	5.534	41.049	27651331	5746795	38858509	C6H10O	505-57-7	885	888	0.00740375
Ethylbenzene	6.144	91.052	2705696	604977	815991	C8H10	100-41-4	897	897	0.000724461
1-Pentene, 2,3-dimethyl-	6.349	69.052	42997849	9332277	18347809	C7H14	3404-72-6	853	855	0.0115128
trans-2-Hexenol	6.366	57.032	256759720	49766756	167597122	C6H12O		882	890	0.0687484
Heptanal	7.908	41.049	4942941	1011667	4794968	C7H14O	111-71-7	832	832	0.00132349
Pentanoic acid, ethyl ester	7.939	85.082	3029362	543588	1347803	C7H14O2	539-82-2	839	839	0.000811124
Bicyclo[3.1.0]hex-2-ene, 2-methyl-5-(1-methylethyl)-	9.381	93.067	753600	168092	168092	C10H16	5/2/2867	863	863	0.000201779
2-Heptenal, (Z)-	10.554	41.049	30995981	5508899	36474336	C7H12O	57266-86-1	931	941	0.0082993
Benzaldehyde	10.739	77.028	2035350	268325	720000	C7H6O	100-52-7	895	895	0.000544973
1-Octen-3-one	11.768	55.027	7329613	2729543	7101433	C8H14O	4312-99-6	859	859	0.00196253
1-Octen-3-ol	11.842	57.032	33159108	5494378	10104479	C8H16O	3391-86-4	857	857	0.00887848
3-Heptanone, 5-methyl-	12.191	57.032	12960014	2996532	9959412	C8H16O	541-85-5	851	853	0.0034701
5-Hepten-2-one, 6-methyl-	12.204	43.019	61160409	10140301	33838677	C8H14O	110-93-0	859	869	0.0163759
Hexanoic acid	12.553	60.063	4326874	917284	1791240	C6H12O2	142-62-1	811	811	0.00115854
1-Hexanol, 2-ethyl-	14.478	57.032	6711368	1282494	3581718	C8H18O	104-76-7	885	885	0.001797
Benzeneacetaldehyde	15.135	91.052	1900816	271478	271478	C8H8O	122-78-1	859	859	0.000508951
cis-2,6-Dimethyl-2,6-octadiene	15.689	41.049	9556579	1926874	5504288	C10H18	2492-22-0	814	843	0.00255881
Cyclobutane, butyl-	16.715	41.049	1501069	387418	1486884	C8H16	13152-44-8	806	842	0.000401917
Nonanal	18.378	57.032	13534999	2807765	23233265	C9H18O	124-19-6	914	914	0.00362405
2-Oxopentanedioic acid	19.002	101.087	2261956	409915	409915	C5H6O5	328-50-7	819	823	0.000605648
o-Aminobenzohydroxamic acid	22.909	120.104	2056900	284011	284011	C7H8N2O2	4/1/5623	807	812	0.000550743
Decanal	23.529	41.049	6764873	1413653	12162760	C10H20O	112-31-2	913	914	0.00181132
Benzaldehyde, 2,4-dimethyl-	23.838	133.023	4498766	581010	1654833	C9H10O	15764-16-6	925	925	0.00120456
1-Cyclohexene-1-carboxaldehyde, 2,6,6-trimethyl-	24.163	109.064	1035645	206858	412407	C10H16O	432-25-7	809	809	0.000277298
Benzene, 1,3-bis(1,1-dimethylethyl)-	25.85	175.156	3490249	769102	1171589	C14H22	1014-60-4	907	907	0.000934528
2-Decenal, (Z)-	26.226	41.049	1241777	304400	824285	C10H18O	2497-25-8	883	891	0.000332491
Benzene, 1,2,4-trichloro-5-methoxy-	29.21	194.931	1310053	237412	459616	C7H5Cl3O	6130-75-2	878	879	0.000350772
2-Buten-1-one, 1-(2,6,6-trimethyl-1,3-cyclohexadien-1-yl)-, (E)-	32.105	69.052	20715334	5118988	16978779	C13H18O	23726-93-4	902	930	0.00554661
Decane, 2,3,5-trimethyl-	32.809	57.032	3420503	894648	2909276	C13H28	62238-11-3	860	885	0.000915853
5,9-Undecadien-2-one, 6,10-dimethyl-, (E)-	34.476	43.019	13828418	4399028	13025420	C13H22O	3796-70-1	885	886	0.00370261
Diisopropyl adipate	34.553	129.117	647856	192131	192131	C12H22O4	6938-94-9	810	812	0.000173466
1-Decanol	35.039	69.052	331729	110939	110939	C10H22O	112-30-1	815	815	8.88218e-05
trans-.beta.-Ionone	35.341	177.129	1799989	608626	1031315	C13H20O	79-77-6	905	908	0.000481954
Undecane, 3,8-dimethyl-	35.575	71.071	764163	285770	812469	C13H28	17301-30-3	802	807	0.000204608
Dodecane, 2,7,10-trimethyl-	35.659	57.032	1624228	600117	1983175	C15H32	74645-98-0	868	876	0.000434894
2,4-Di-tert-butylphenol	35.951	191.136	9105733	3600747	8697243	C14H22O	96-76-4	926	926	0.0024381
Diethyltoluamide	37.286	119.045	2686121	896998	1616858	C12H17NO	134-62-3	904	906	0.00071922
Diethyl Phthalate	37.557	149.019	1035736	360838	360838	C12H14O4	84-66-2	913	913	0.000277322
Pentanoic acid, 2,2,4-trimethyl-3-carboxyisopropyl, isobutyl ester	37.601	71.071	9736382	3955333	8581793	C16H30O4		803	804	0.00260695
Cyclopentaneacetic acid, 3-oxo-2-pentyl-, methyl ester	38.53	83.053	10110815	4209836	15806040	C13H22O3	24851-98-7	810	822	0.00270721
Phenol, 2,4-di-t-butyl-6-nitro-	39.05	236.13	974734	423774	423774	C14H21NO3	20039-94-5	813	850	0.000260989
Methanone, (1-hydroxycyclohexyl)phenyl-	39.103	99.09	1600460	522798	910667	C13H16O2	947-19-3	876	876	0.00042853
Undecane, 3,8-dimethyl-	39.325	71.071	4536495	1626263	8580802	C13H28	17301-30-3	824	842	0.00121466
Dibutyl phthalate	41.377	149.019	7634050	3014372	4870990	C16H22O4	84-74-2	865	871	0.00204405
7,9-Di-tert-butyl-1-oxaspiro(4,5)deca-6,9-diene-2,8-dione	42.011	205.075	349431	158631	158631	C17H24O3	82304-66-3	850	867	9.35615e-05
Dibutyl phthalate	42.444	149.019	4642409	1746094	2226159	C16H22O4	84-74-2	912	941	0.00124302
3-Octanol	12.8		4.62178e+09	6.58338e+08						1.2375

## Sheet: B
Table S1 Aroma substance content after different light quality treatments
Component Name	Retention Time	Reference m/z	BP Area	BP Height	TIC	Formula (mol ion)	CAS No.	SI	RSI	Content(mg/g)
Carbamic acid, monoammonium salt	1.308	44.028	21616754	11175999	11540604	CH6N2O2	1111-78-0	952	972	0.00767829
Acetaldehyde	1.372	44.044	13123627	4817723	8149631	C2H4O	75-07-0	929	929	0.00466152
Methacrolein	1.697	39.025	530219	199457	199457	C4H6O	78-85-3	850	850	0.000188334
Acetic acid	1.721	44.999	24300069	4539691	10433473	C2H4O2	64-19-7	823	823	0.00863141
Ethyl Acetate	1.868	43.063	25708487	8363761	14372578	C4H8O2	141-78-6	872	872	0.00913168
Trichloromethane	1.895	83.052	2162980	967971	1857199	CHCl3	67-66-3	921	922	0.000768292
Propanoic acid, anhydride	2.331	57.049	4108672	1423286	1760077	C6H10O3	123-62-6	808	827	0.0014594
1-Penten-3-one	2.378	55.037	6301481	2022421	2267241	C5H8O	1629-58-9	805	805	0.00223829
Propargyl alcohol	2.462	55.037	3948176	1241780	1241780	C3H4O	107-19-7	825	876	0.0014024
Pentanal	2.469	44.044	15459814	5346036	16315262	C5H10O	110-62-3	866	890	0.00549134
Pentane, 1-chloro-	3.237	55.037	5976953	1233945	5438666	C5H11Cl	543-59-9	927	927	0.00212302
3-Nitro-2-methyl propene	3.3	55.037	1870140	580048	947419	C4H7NO2	1606-31-1	803	808	0.000664275
sec-Butyl acetate	3.317	43.063	7472005	2516264	3272122	C6H12O2	105-46-4	852	856	0.00265406
1-Pentene	3.461	42.065	3085125	726561	2179979	C5H10	109-67-1	857	878	0.00109584
Toluene	3.481	91.071	9764839	1879052	3683539	C7H8	108-88-3	942	942	0.00346848
2,3-Butanediol, [S-(R*,R*)]-	3.686	44.999	25936821	6978506	10489943	C4H10O2	19132-06-0	940	943	0.00921278
2,3-Butanediol, [S-(R*,R*)]-	3.907	44.999	18730844	5051326	6893529	C4H10O2	19132-06-0	921	932	0.00665321
n-Propyl acetate	4.555	43.063	7868278	1242179	1242179	C5H10O2	109-60-4	847	847	0.00279482
Oxalic acid, allyl butyl ester	4.732	41.049	777300	415378	648116	C9H14O4		815	868	0.000276098
2-Hexenal	5.517	41.049	36227508	7133259	46545668	C6H10O	505-57-7	856	856	0.012868
Methanamine, N,N-difluoro-	5.96	67.03	29539456	3476365	3476365	CH3F2N	753-58-2	945	985	0.0104924
Ethylbenzene	6.134	91.071	3609423	883407	1185769	C8H10	100-41-4	915	915	0.00128207
7-Oxabicyclo[4.1.0]heptane	6.339	83.052	34927015	7476549	12188309	C6H10O	286-20-4	943	943	0.0124061
3,3'-Bifuran, 2,2',3,3'-tetrahydro-	6.345	69.055	59327067	11887258	16778116	C8H10O2	98869-94-4	910	920	0.021073
trans-2-Hexenol	6.359	57.049	373553214	84831450	317797159	C6H12O		911	923	0.132686
1-Hexanol	6.459	56.064	189607898	48727108	215424409	C6H14O	111-27-3	895	895	0.0673489
p-Xylene	7.472	91.071	5261947	619205	880839	C8H10	106-42-3	801	813	0.00186905
Oxime-, methoxy-phenyl-_	8.173	133.022	4408635	692348	1086976	C8H9NO2		825	833	0.00156595
2-Heptenal, (Z)-	10.561	41.049	17250104	2835493	18419219	C7H12O	57266-86-1	906	914	0.00612725
Benzaldehyde	10.739	105.081	887483	226887	226887	C7H6O	100-52-7	842	842	0.000315235
1-Octen-3-one	11.775	55.037	4407327	1681781	3668204	C8H14O	4312-99-6	867	870	0.00156549
Cyclobutanone, 2,2,3-trimethyl-	11.822	55.037	8757101	1906140	3709276	C7H12O	1449-49-6	816	825	0.00311053
Propanoyl chloride, 2-methyl-	11.839	43.063	4324753	849180	2033764	C4H7ClO	79-30-1	815	819	0.00153616
5-Hepten-2-one, 6-methyl-	12.197	43.063	56738117	9666256	33014090	C8H14O	110-93-0	867	874	0.0201534
Pentanoic acid	12.949	60.069	4460922	426835	426835	C5H10O2	109-52-4	891	930	0.00158452
Bicyclo[3.1.0]hexane, 4-methylene-1-(1-methylethyl)-	14.303	93.068	1636546	315412	315412	C10H16	3387-41-5	839	839	0.000581303
1-Hexanol, 2-ethyl-	14.464	57.049	12214843	2547349	8190816	C8H18O	104-76-7	895	900	0.00433872
Octane, 3,4,5,6-tetramethyl-	15.953	57.049	4051521	732937	2002756	C12H26	62185-21-1	803	816	0.0014391
Nonanal	18.375	57.049	14755173	3137159	25337189	C9H18O	124-19-6	924	924	0.00524105
Decanal	23.526	41.049	7672485	1571413	13503139	C10H20O	112-31-2	912	912	0.00272527
Benzaldehyde, 2,4-dimethyl-	23.868	133.022	661790	183709	183709	C9H10O	15764-16-6	849	852	0.000235068
Benzene, 1,3-bis(1,1-dimethylethyl)-	25.847	175.149	4511252	998544	1558472	C14H22	1014-60-4	924	926	0.0016024
Benzene, 1,3,5-trichloro-2-methoxy-	29.207	194.906	1473818	265016	523338	C7H5Cl3O	87-40-1	891	891	0.000523502
Butanoic acid, butyl ester	31.531	71.068	2479192	488515	1530131	C8H16O2	109-21-7	805	806	0.000880611
2-Buten-1-one, 1-(2,6,6-trimethyl-1,3-cyclohexadien-1-yl)-, (E)-	32.104	69.055	10012241	2419292	6898041	C13H18O	23726-93-4	907	925	0.00355636
Decane, 2,3,5-trimethyl-	32.805	57.049	3588041	970614	3164052	C13H28	62238-11-3	858	875	0.00127448
Caryophyllene	33.436	91.071	400366	116388	116388	C15H24	87-44-5	813	813	0.00014221
5,9-Undecadien-2-one, 6,10-dimethyl-, (E)-	34.475	43.063	12736716	3937033	10887881	C13H22O	3796-70-1	890	890	0.00452409
Diisopropyl adipate	34.549	129.127	1091659	335807	335807	C12H22O4	6938-94-9	839	839	0.000387758
1-Acetyl-4-piperidone	34.905	112.902	516183	170368	170368	C7H11NO2	32161-06-1	856	921	0.000183349
trans-.beta.-Ionone	35.344	177.125	1744395	598189	1004099	C13H20O	79-77-6	894	894	0.000619611
Pentadecane	35.659	57.049	1682920	629409	2094274	C15H32	629-62-9	869	869	0.000597775
2,4-Di-tert-butylphenol	35.948	191.146	29128279	11768152	36224459	C14H22O	96-76-4	921	921	0.0103464
Benzamide, N,N-diethyl-4-methyl-	37.286	119.059	4326290	1431977	2848775	C12H17NO	5/4/2728	901	905	0.0015367
Diethyl Phthalate	37.557	149.022	1676897	588691	588691	C12H14O4	84-66-2	902	902	0.000595635
Pentanoic acid, 2,2,4-trimethyl-3-carboxyisopropyl, isobutyl ester	37.601	71.068	17007732	7089165	15981874	C16H30O4		846	847	0.00604116
Cyclopentaneacetic acid, 3-oxo-2-pentyl-, methyl ester	38.53	83.052	10809135	4439596	16568802	C13H22O3	24851-98-7	802	815	0.00383941
Methanone, (1-hydroxycyclohexyl)phenyl-	39.1	99.093	3914636	1436129	4170677	C13H16O2	947-19-3	893	896	0.00139048
Tridecane, 2-methyl-	39.325	71.068	9302189	3299752	19097318	C14H30	1560-96-9	828	845	0.00330415
Decane, 2,4-dimethyl-	40.606	57.049	608975	205071	205071	C12H26	2801-84-5	802	821	0.000216308
1,2-Benzenedicarboxylic acid, bis(2-methylpropyl) ester	41.377	149.022	12469151	4944132	8685006	C16H22O4	84-69-5	879	879	0.00442905
2-Bromo dodecane	41.977	71.068	4485481	1835380	10671780	C12H25Br	13187-99-0	821	838	0.00159325
7,9-Di-tert-butyl-1-oxaspiro(4,5)deca-6,9-diene-2,8-dione	42.011	205.08	382022	171818	171818	C17H24O3	82304-66-3	818	829	0.000135695
Dibutyl phthalate	42.443	149.022	6843380	2521116	3155122	C16H22O4	84-74-2	917	948	0.00243077
3-Octanol	12.76		3.48394e+09	5.67315e+08						1.2375

## Sheet: C
Table S1 Aroma substance content after different light quality treatments
Component Name	Retention Time	Reference m/z	BP Area	BP Height	TIC	Formula (mol ion)	CAS No.	SI	RSI	Content(mg/g)
Acetaldehyde	1.372	44.028	14839252	5992985	10087240	C2H4O	75-07-0	938	938	0.00410761
Methacrolein	1.697	39.023	580692	244602	244602	C4H6O	78-85-3	840	840	0.00016074
Ethyl Acetate	1.868	43.031	23436742	8003433	13253493	C4H8O2	141-78-6	881	884	0.00648746
Trichloromethane	1.895	83.058	4155990	1849796	3758129	CHCl3	67-66-3	937	937	0.00115041
1-Butanol	2.174	41.044	2422279	757388	2500042	C4H10O	71-36-3	891	891	0.000670504
3-Buten-2-one, 3-methyl-	2.278	41.044	1196328	410825	1033369	C5H8O	814-78-8	837	837	0.000331152
Pentanal	2.469	44.028	22571694	7751453	23774604	C5H10O	110-62-3	861	884	0.00624801
1,3-Dioxolane, 2,4,5-trimethyl-	2.841	43.031	610931	295607	498603	C6H12O2	3299-32-9	862	862	0.00016911
Pentane, 1-chloro-	3.237	55.028	5055515	1833695	8250425	C5H11Cl	543-59-9	910	911	0.0013994
sec-Butyl acetate	3.317	43.031	8133039	2702070	3797049	C6H12O2	105-46-4	850	850	0.00225128
1-Pentanol	3.465	42.062	2597994	589391	1739480	C5H12O	71-41-0	829	829	0.000719143
Toluene	3.485	91.064	7575608	1391558	2168918	C7H8	108-88-3	914	914	0.00209698
Cyclobutene, 2-propenylidene-	3.683	91.064	1716237	286311	286311	C7H8	52097-85-5	872	877	0.000475067
2,3-Butanediol, [S-(R*,R*)]-	3.696	45	16270306	3801426	5393799	C4H10O2	19132-06-0	946	953	0.00450374
2,3-Butanediol, [S-(R*,R*)]-	3.917	45	10615219	2607701	3316736	C4H10O2	19132-06-0	946	953	0.00293837
n-Propyl acetate	4.561	43.031	4690302	862780	862780	C5H10O2	109-60-4	860	860	0.00129831
2-Hexenal	5.52	41.044	31798546	6339946	42475636	C6H10O	505-57-7	886	886	0.00880206
1,1-Difluoro-trans-2,3-dimethyl-cyclopropane	6.134	91.064	2596052	619102	955150	C5H8F2		883	908	0.000718606
4-Methyl-2-pyrazolin-5-one	6.332	97.056	4461682	1131980	2440365	C4H6N2O	13315-23-6	881	890	0.00123503
2-Methylthiolane, S,S-dioxide	6.342	55.028	55073226	11854376	23894286	C5H10O2S	1003-46-9	826	835	0.0152447
2-Hexen-1-ol, (E)-	6.355	57.037	224319519	35184372	109356632	C6H12O	928-95-0	887	887	0.0620932
Cyclopropane, propyl-	6.459	56.068	97295283	22113724	94780593	C6H12	2415-72-7	881	890	0.026932
Benzeneethanol, .alpha.,.beta.-dimethyl-	7.479	91.064	3068710	431179	431179	C10H14O	52089-32-4	812	840	0.000849441
Oxime-, methoxy-phenyl-_	8.197	132.976	4424112	614353	961062	C8H9NO2		844	848	0.00122463
Bicyclo[3.1.0]hex-2-ene, 4-methyl-1-(1-methylethyl)-	9.38	93.064	623734	147942	147942	C10H16	28634-89-1	860	871	0.000172654
2-Heptenal, (Z)-	10.554	41.044	24836629	4340175	28199511	C7H12O	57266-86-1	922	931	0.00687496
1-Octen-3-one	11.772	55.028	6682330	2417976	6024436	C8H14O	4312-99-6	883	890	0.00184972
1-Hepten-3-one	11.818	55.028	13718155	2740836	5135902	C7H12O	2918-13-0	850	852	0.00379728
1-Octen-3-ol	11.842	57.037	24326380	4203295	5968498	C8H16O	3391-86-4	831	831	0.00673371
3-Heptanone, 5-methyl-	12.187	57.037	11186312	2860620	9167152	C8H16O	541-85-5	857	858	0.00309645
5-Hepten-2-one, 6-methyl-	12.201	43.031	54176996	9121814	29161596	C8H14O	110-93-0	849	859	0.0149966
Pentanoic acid	12.546	60.064	3874625	834499	1638503	C5H10O2	109-52-4	801	801	0.00107252
Cyclohexane,ethenylidene-	12.62	108.086	812816	215375	215375	C8H12	5664-20-0	815	864	0.000224993
Octanal	13.043	43.031	11264015	1885749	9712143	C8H16O	124-13-0	856	856	0.00311796
.beta.-Phellandrene	14.31	93.064	1060169	215037	215037	C10H16	555-10-2	828	829	0.000293462
1-Hexanol, 2-ethyl-	14.458	57.037	23239742	4669404	15434343	C8H18O	104-76-7	920	923	0.00643293
cis-2,6-Dimethyl-2,6-octadiene	15.692	41.044	8226507	1657561	4822368	C10H18	2492-22-0	839	852	0.00227716
Oxalic acid, allyl ethyl ester	15.94	57.037	4294622	668675	668675	C7H10O4		855	855	0.00118878
Heptane, 4-ethyl-2,2,6,6-tetramethyl-	15.957	71.067	1857550	304118	304118	C13H28	62108-31-0	810	810	0.000514183
Nonanal	18.378	57.037	13105095	2630085	20368747	C9H18O	124-19-6	904	904	0.00362758
Cyclohexanol, 1-methyl-4-(1-methylethyl)-	21.792	71.067	5494587	1083554	7570139	C10H20O	21129-27-1	924	934	0.00152094
Dill ether	22.429	137.053	1476408	295347	295347	C10H16O	74410-10-9	841	845	0.00040868
Decanal	23.529	41.044	6357108	1292966	11124956	C10H20O	112-31-2	919	919	0.00175969
Benzaldehyde, 2,4-dimethyl-	23.848	132.976	3507532	444378	1009115	C9H10O	15764-16-6	894	894	0.00097091
Benzene, 1,3-bis(1,1-dimethylethyl)-	25.847	175.141	5343716	1208005	1855864	C14H22	1014-60-4	893	893	0.00147918
Formamide, N,N-dibutyl-	28.1	72.057	136012898	30244235	90637228	C9H19NO	761-65-9	865	865	0.0376493
2-Buten-1-one, 1-(2,6,6-trimethyl-1,3-cyclohexadien-1-yl)-, (E)-	32.101	69.038	16886150	4163202	13124877	C13H18O	23726-93-4	912	941	0.00467421
Tetradecane	32.805	57.037	3365381	882290	2849785	C14H30	629-59-4	871	876	0.000931561
5,9-Undecadien-2-one, 6,10-dimethyl-, (E)-	34.472	43.031	14837825	4634245	13722292	C13H22O	3796-70-1	900	901	0.00410722
Diisopropyl adipate	34.549	129.097	819795	254844	254844	C12H22O4	6938-94-9	808	812	0.000226925
Heptyl ethylphosphonofluoridate	35.19	112.855	1135902	227425	682275	C9H20FO2P	162085-85-0	831	927	0.000314426
trans-.beta.-Ionone	35.341	177.128	2364846	837894	1577819	C13H20O	79-77-6	901	903	0.000654606
Undecane, 3,7-dimethyl-	35.659	57.037	1419344	520313	1703694	C13H28	17301-29-0	819	839	0.000392884
2,4-Di-tert-butylphenol	35.951	191.14	5140213	1978943	3497753	C14H22O	96-76-4	914	914	0.00142285
Benzamide, N,N-diethyl-4-methyl-	37.286	119.044	2257116	726640	1345823	C12H17NO	5/4/2728	917	923	0.000624786
Diethyl Phthalate	37.554	149.028	1998896	727209	727209	C12H14O4	84-66-2	910	910	0.000553309
Pentanoic acid, 2,2,4-trimethyl-3-carboxyisopropyl, isobutyl ester	37.601	71.067	9377867	3802510	8236514	C16H30O4		815	816	0.00259586
Cyclopentaneacetic acid, 3-oxo-2-pentyl-, methyl ester	38.53	83.058	8869179	3705729	13105369	C13H22O3	24851-98-7	807	818	0.00245505
Phenol, 2,4-di-t-butyl-6-nitro-	39.05	236.125	595614	253532	253532	C14H21NO3	20039-94-5	805	828	0.00016487
Methanone, (1-hydroxycyclohexyl)phenyl-	39.103	99.075	841735	260057	260057	C13H16O2	947-19-3	860	860	0.000232998
Dodecane, 2,6,11-trimethyl-	39.325	71.067	2633999	944455	4010641	C15H32	31295-56-4	808	816	0.00072911
Phthalic acid, hex-3-yl isobutyl ester	41.377	149.028	3944645	1526138	2097426	C18H26O4		887	897	0.00109191
Dibutyl phthalate	42.44	149.028	1743318	666115	666115	C16H22O4	84-74-2	888	923	0.000482563
3-Octanol	12.78		4.47062e+09	6.36928e+08						1.2375
